# Supplementary material for: Multifunctional anthraquinone-sulfonic potassium salts passivate the buried interface for efficient and stable planar perovskite solar cells
Source: Royal Society of Chemistry journal article supplement (doi:10.1039/d3cp00514c), 2023-01-01
Supplement: d3cp00514c1.pdf [file d3cp00514c1.pdf]

## Supporting Information

### Multifunctional Anthraquinone-Sulfonic Potassium Salts Passivates the Buried Interface for Efficient and Stable Planar Perovskite Solar Cells

Yanqiang Hu<sup>a,b</sup>, Zong Xu<sup>a</sup>, Zhi Wang<sup>a</sup>, Yifan Zhou<sup>a</sup>, Wenwu Song<sup>a</sup>, Yushuang Gao<sup>b</sup>, Guangping Sun<sup>a</sup>, Tongming Sun<sup>a</sup>, Shufang Zhang<sup>b,\*</sup>, Yanfeng Tang<sup>a,\*</sup>

<sup>a</sup>College of Chemistry and Chemical Engineer, Nantong University, Nantong 226001, Jiangsu, China.

<sup>b</sup>School of Physics and Photoelectric Engineering, Ludong University, Yantai 264025, Shandong, China.

This file includes **Figure S1-S12** and **Table S1-S3**:

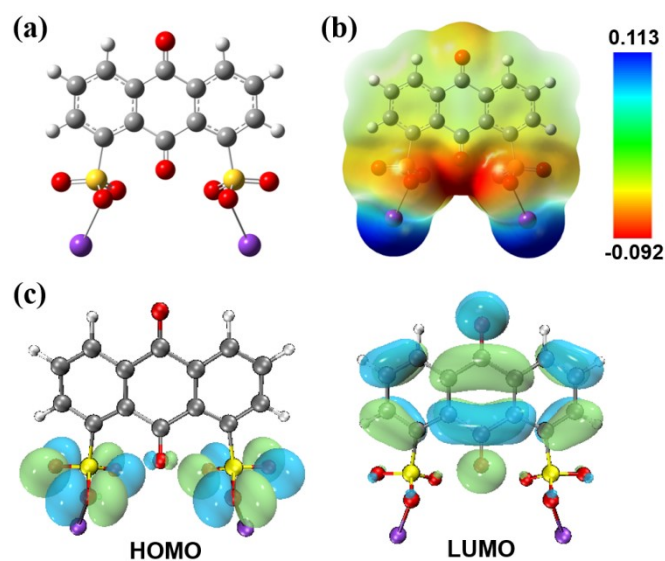

**Figure S1.** (a) Molecular structure, (b) electrostatic surface potential map, and (c) calculated frontier molecular orbitals of ASPS molecule.

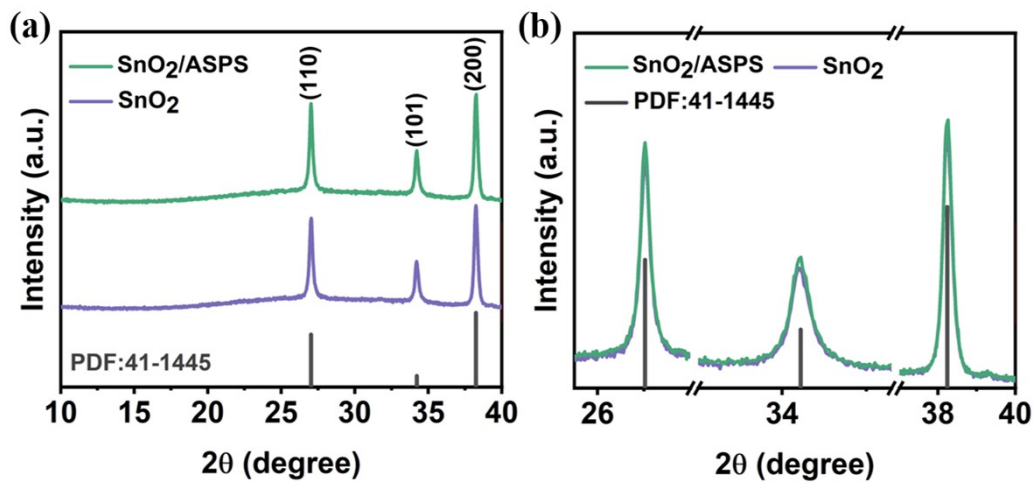

Figure S2. XRD patterns of SnO<sub>2</sub> film without and with ASPS modification.

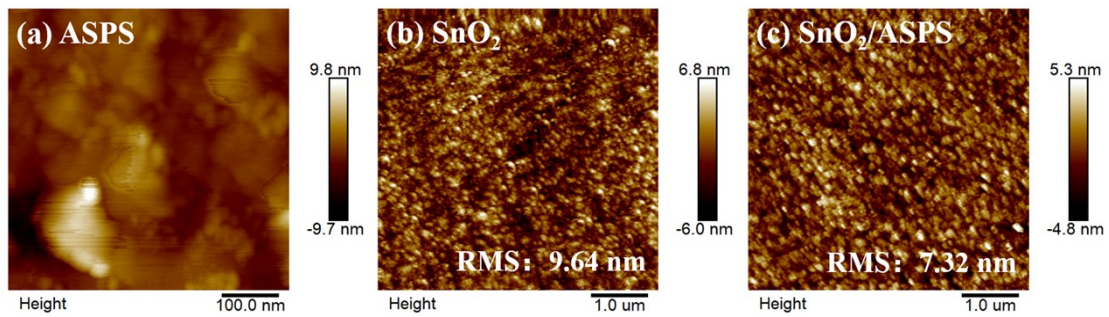

Figure S3. AFM images of (a) ASPS, (b) SnO<sub>2</sub> and (c) ASPS-modified SnO<sub>2</sub> on glass substrates, respectively.

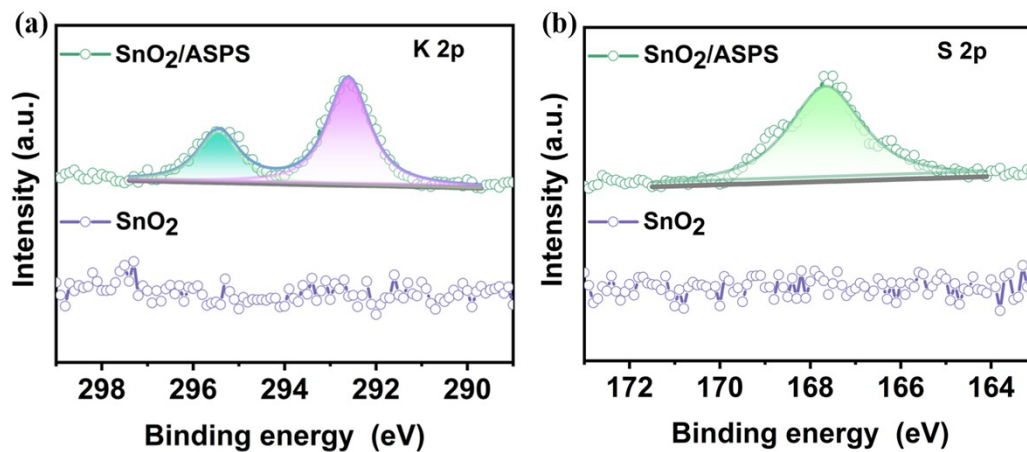

Figure S4. (a) K 2p, and (c) S 2p XPS spectra of SnO<sub>2</sub> and SnO<sub>2</sub>/ASPS substrates, respectively.

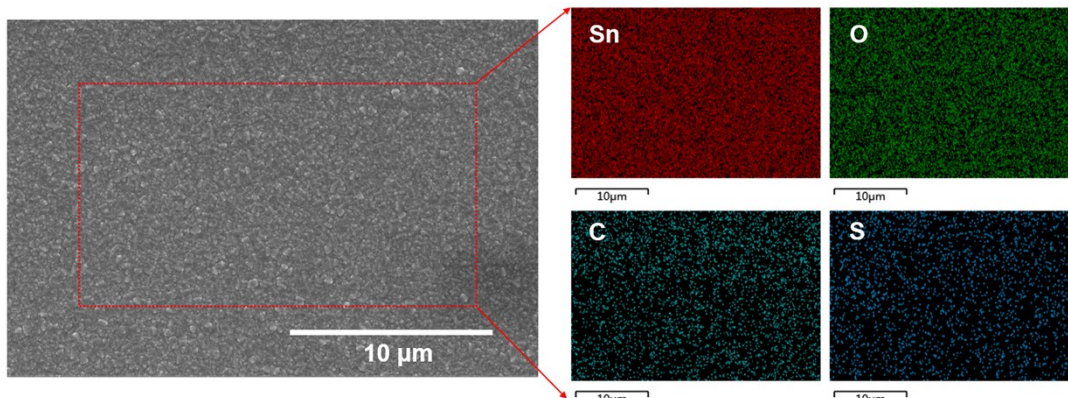

**Figure S5.** Top-view SEM and corresponding energy dispersive spectroscopy (EDS) mapping of SnO<sub>2</sub>/ASPS substrate, respectively.

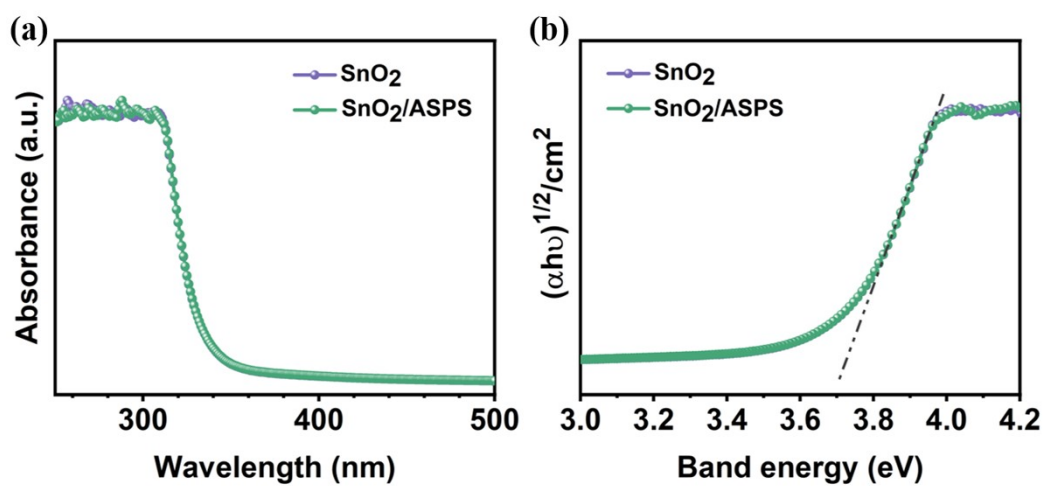

**Figure S6.** (a) Optical absorbance and (d) corresponding Tauc plots of SnO<sub>2</sub> film without or with ASPS modification.

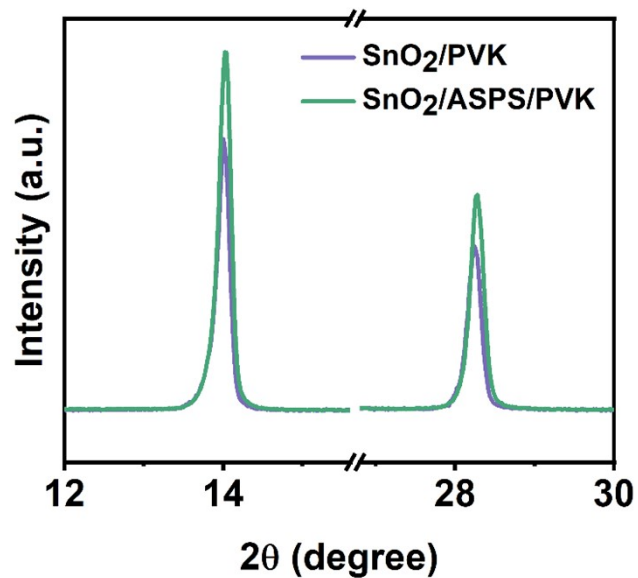

**Figure S7.** Region amplified XRD pattern of PVK films deposited on SnO<sub>2</sub> and SnO<sub>2</sub>/ASPS substrates.

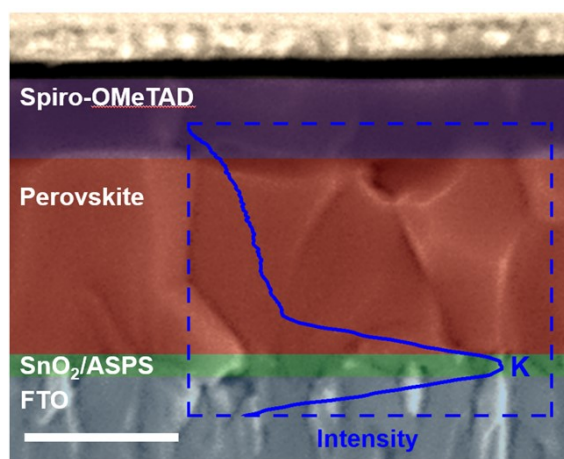

**Figure S8.** Elemental scanning in a liner mode through the cross-section of SnO<sub>2</sub>/ASPS/PVK. Scale bar: 500 nm.

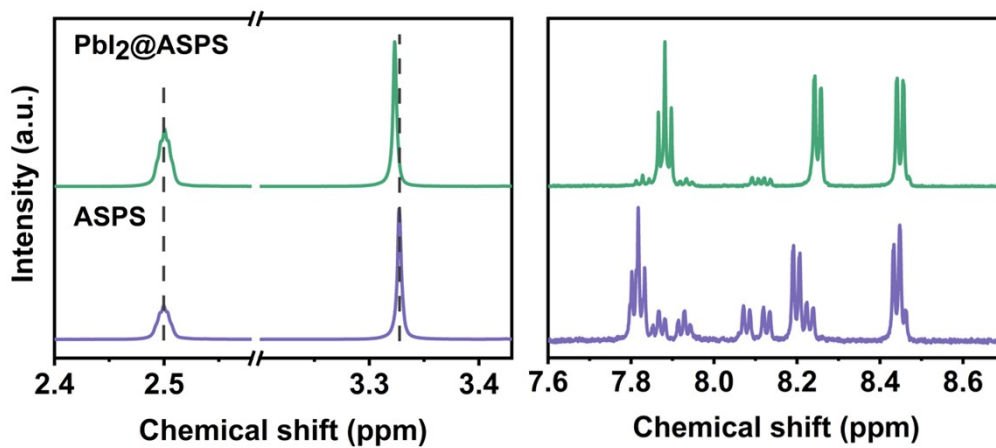

**Figure S9.** Liquid-state  $^1\text{H}$  NMR spectra of pure ASPS and  $\text{Pbl}_2@ASPS$  dissolving in  $\text{DMSO}-d_6$ , respectively.

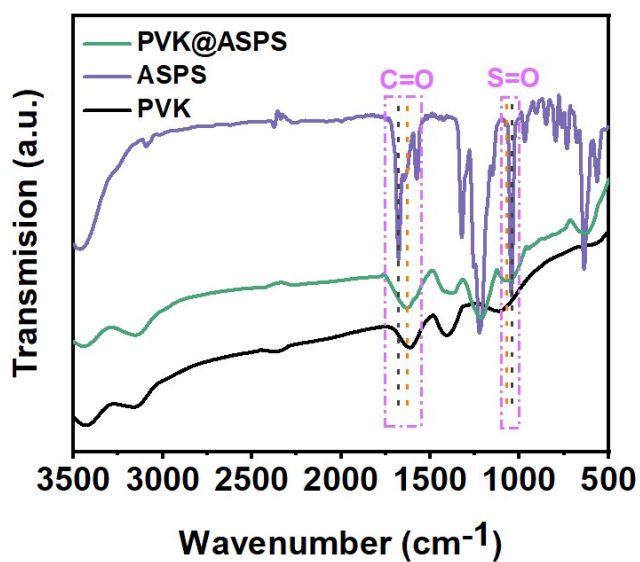

**Figure S10.** FTIR spectra of PVK, pure ASPS powder, and  $\text{PVK}@ASPS$ , respectively.

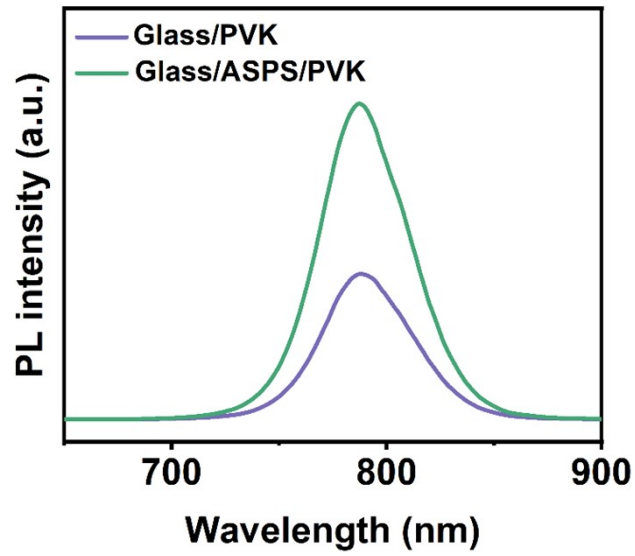

**Figure S11.** The steady-state PL spectra of PVK films deposited on SnO<sub>2</sub> and SnO<sub>2</sub>/ASPS substrates.

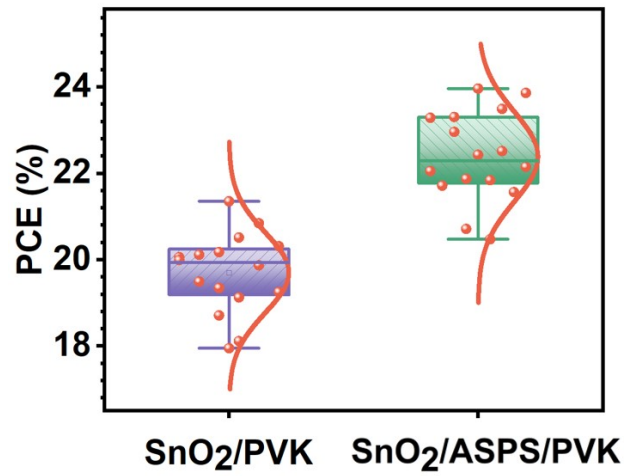

**Figure S12.** Statistical distribution of PCE of the controlled and optimized PSCs. The statistical data were collected from 16 cells for each case.

**Table S1.** The photovoltaic parameters of the champion devices with different concentrations of ASPS.

| ASPS (mg/mL) | Voc (V) | Jsc (mA/cm <sup>2</sup> ) | FF (%) | PCE (%) |
|--------------|---------|---------------------------|--------|---------|
| 0.0          | 1.10    | 24.47                     | 79.37  | 21.36   |
| 0.25         | 1.13    | 24.51                     | 80.83  | 22.39   |
| 0.5          | 1.16    | 24.57                     | 81.98  | 23.36   |
| 0.75         | 1.17    | 24.76                     | 82.70  | 23.96   |
| 1.0          | 1.15    | 24.43                     | 79.83  | 22.43   |

**Table S2.** The photovoltaic parameters of the champion devices with AD, ADA, and ASPS, respectively.

| Sample |    | Voc (V) | Jsc (mA/cm <sup>2</sup> ) | FF (%) | PCE (%) |
|--------|----|---------|---------------------------|--------|---------|
| AD     | FS | 1.12    | 24.59                     | 78.83  | 21.71   |
|        | RS | 1.16    | 24.61                     | 81.32  | 23.21   |
| ADA    | FS | 1.13    | 24.67                     | 80.03  | 22.31   |
|        | RS | 1.16    | 24.70                     | 82.86  | 23.74   |
| ASPS   | FS | 1.16    | 24.75                     | 80.16  | 23.01   |
|        | RS | 1.17    | 24.76                     | 82.70  | 23.96   |

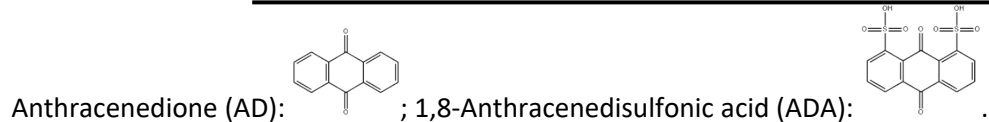

**Table S3.** Initial photovoltaic parameters of the stability test device under reverse scanning.

|                   | Voc (V) | Jsc (mA/cm <sup>2</sup> ) | FF (%) | PCE (%) |       |
|-------------------|---------|---------------------------|--------|---------|-------|
| Storage stability | 0.0     | 1.09                      | 24.45  | 78.56   | 20.94 |
|                   | 0.75    | 1.16                      | 24.74  | 80.96   | 23.23 |
| Thermal stability | 0.0     | 1.08                      | 24.46  | 78.43   | 20.72 |
|                   | 0.75    | 1.15                      | 24.70  | 81.12   | 23.04 |

---

|                 |      |      |       |       |       |
|-----------------|------|------|-------|-------|-------|
| Light stability | 0.0  | 1.08 | 24.45 | 78.34 | 20.69 |
|                 | 0.75 | 1.14 | 24.73 | 80.70 | 22.75 |

---
